# Supplementary material for: Determination and quantification of related substances and degradation products in bictegravir by full factorial design evaluated HPLC and mass spectrometry
Source: Royal Society of Chemistry journal article supplement (doi:10.1039/d2ay02106d), 2023-01-01
Supplement: d2ay02106d1.pdf [file d2ay02106d1.pdf]

1

2

3 **Determination and quantification of related substances and degradation products in Bictegravir**  
4 **by Full Factorial Design evaluated HPLC and Mass Spectrometry.**

5

6 S. R. Jythesh Kumar <sup>a, b</sup>, Vandavasi Koteswara Rao <sup>a, \*</sup>, Naresh Kumar Katari <sup>a</sup>, N. Siva Jyothi <sup>b</sup>, Leela  
7 Prasad Kowtharapu <sup>a</sup>

8 <sup>a</sup> *Department of Chemistry, GITAM School of Science, Rudraram, Hyderabad, Telangana 502329,*  
9 *India*

10 <sup>b</sup> *Department of Analytical Research, Aurobindo Pharma Limited Research Centre-II, Indrakaran (V),*  
11 *Kandi (M), Sangareddy- 502329, Telangana, India.*

12

13 **\*Correspondence to:**

14 Dr.Vandavasi Koteswara Rao, Department of Chemistry, GITAM School of Science, Rudraram,  
15 Hyderabad, Telangana 502329, India.

16 Email: kvandava@gitam.edu; mobile: +91-8096768612

17

18  
19  
20  
21  
22  
23  
24  
25  
26  
27  
28  
29  
30  
31  
32  
33  
34  
35  
36  
37  
38  
39

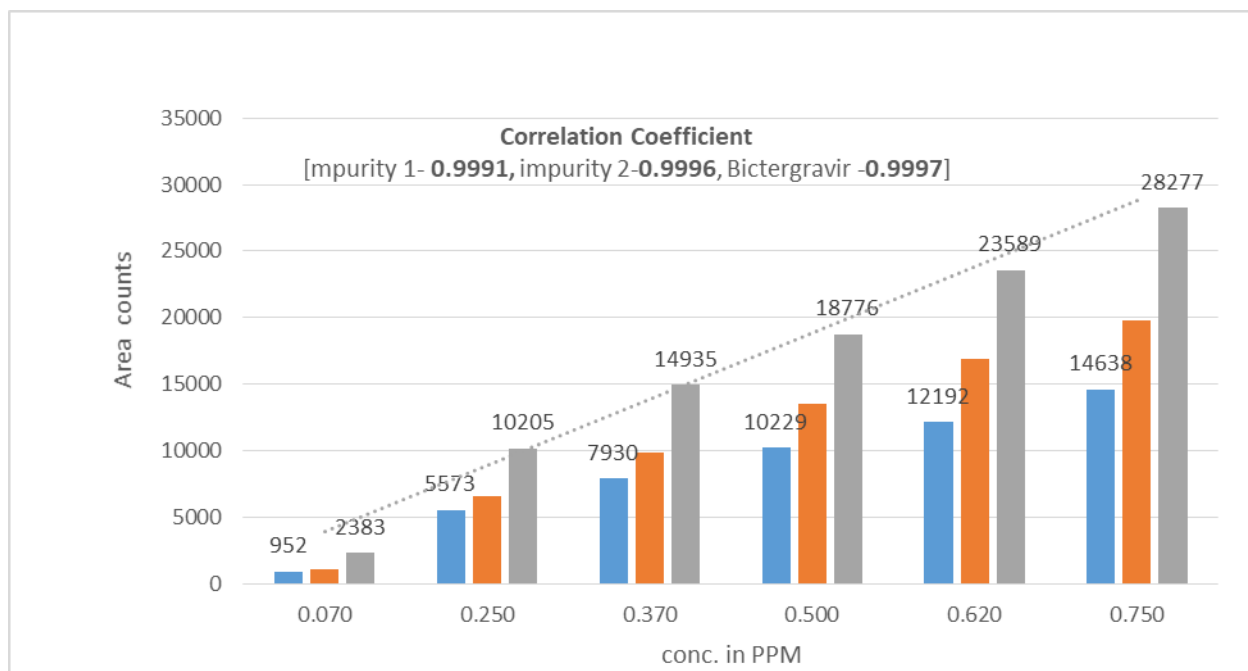

Fig. S1. Linearity plot of Bictogravir (gray bar), Impurity-I (blue bar) and Impurity-II (orange bar)

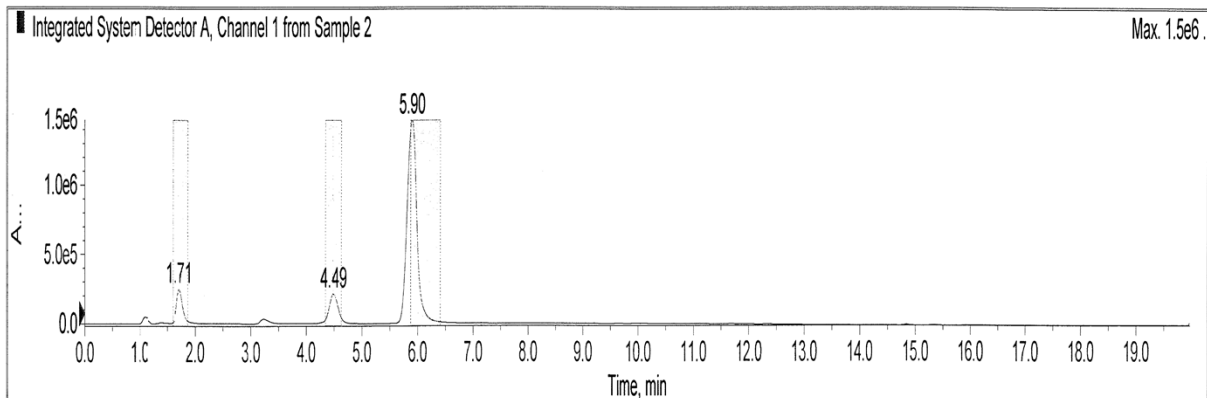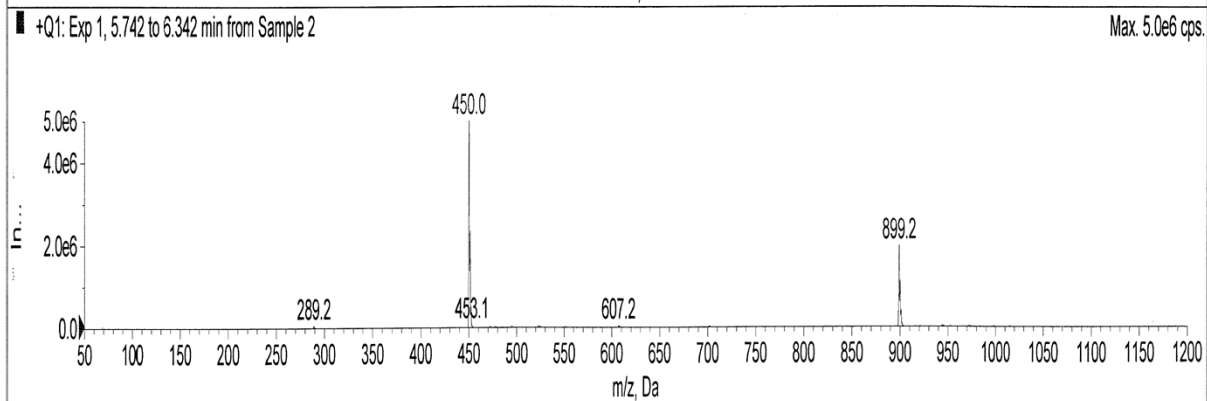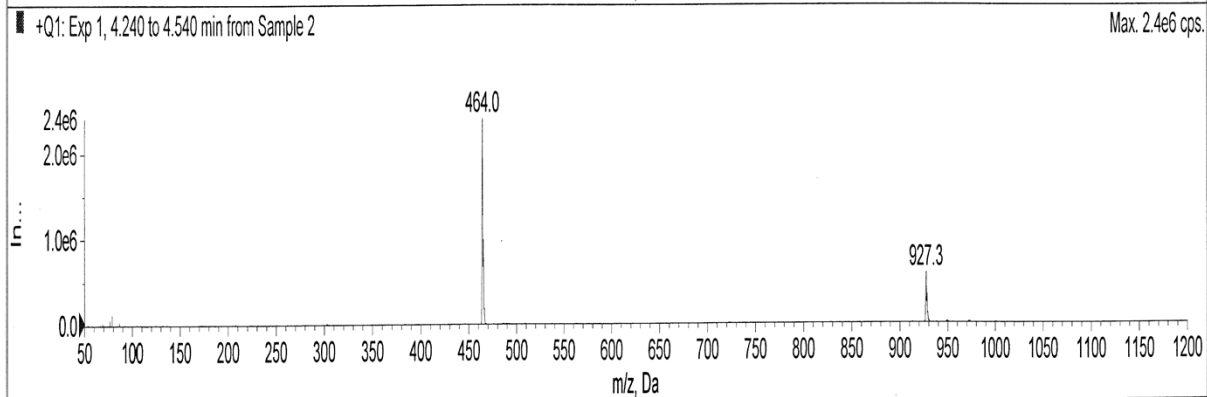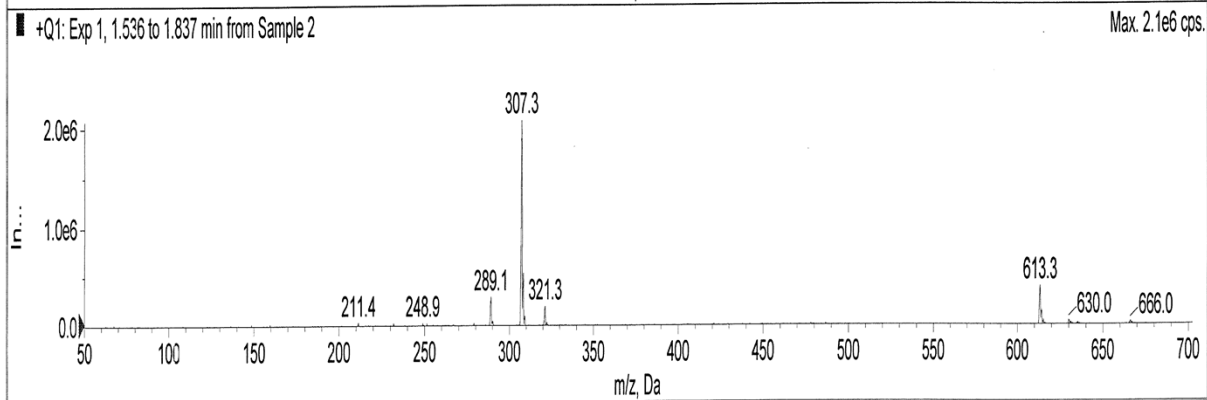

40

Fig. S2. Mass Spectra of determined impurities and Bictegravir

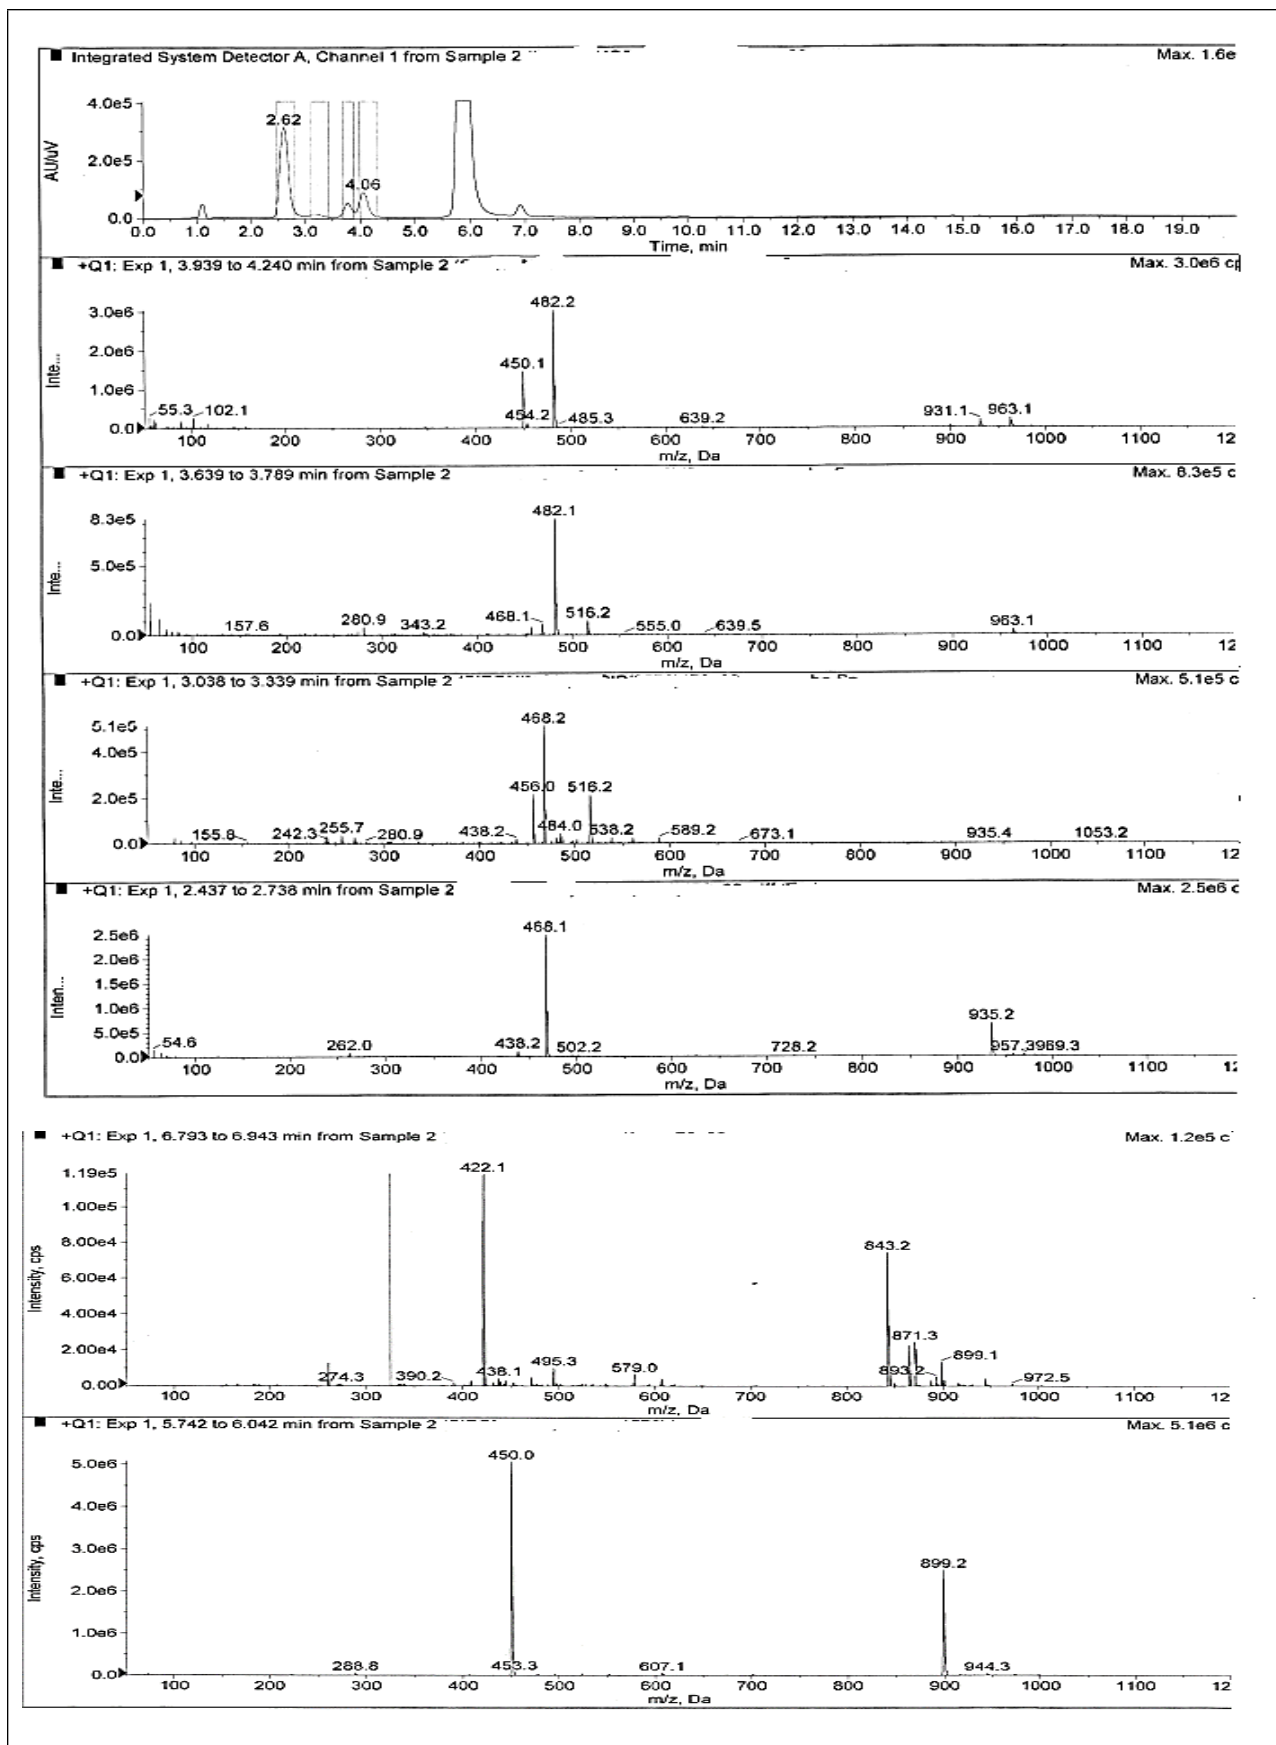

41 Fig. S3. LCMS Mass Spectra of degraded Bictegravir in acid

42

43

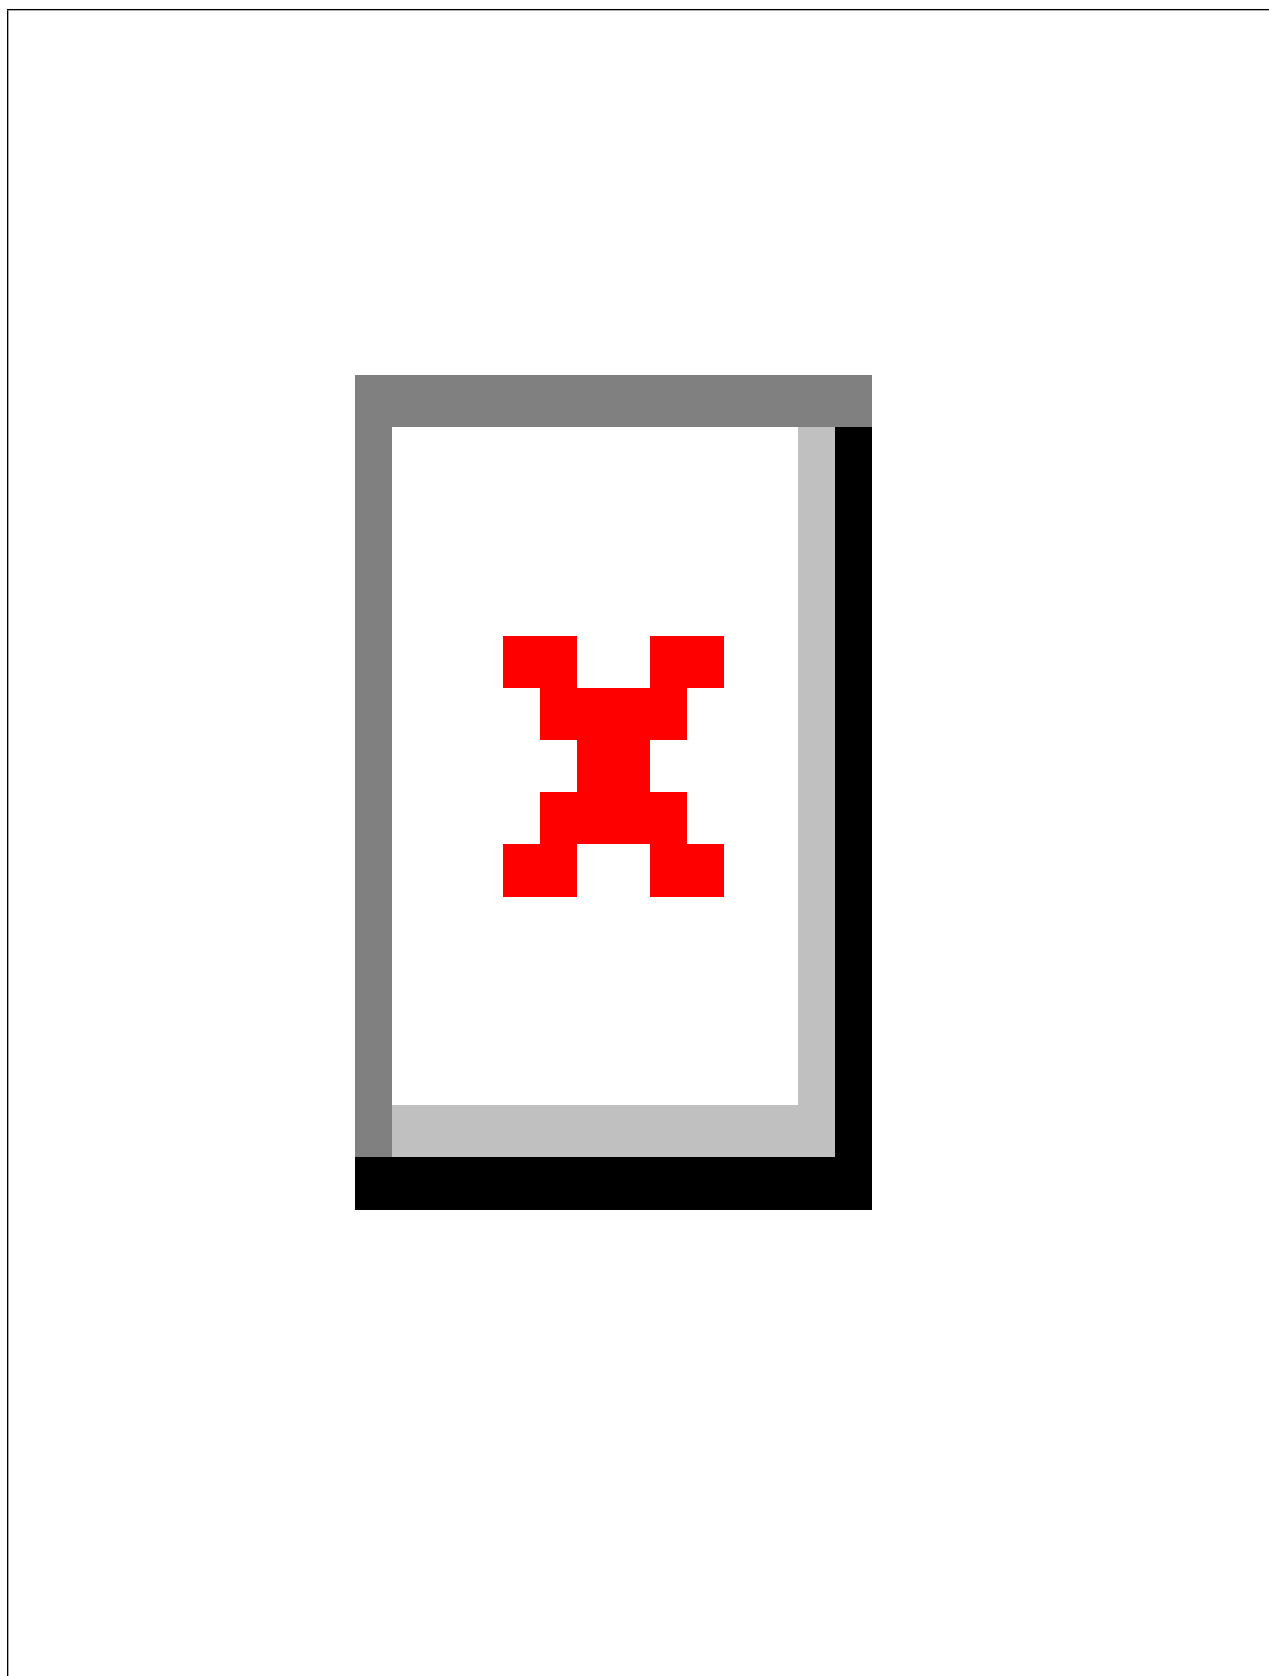

44

Fig. S4. LCMS/MS fragmentation pattern of degraded Bictegravir in acid

45  
46

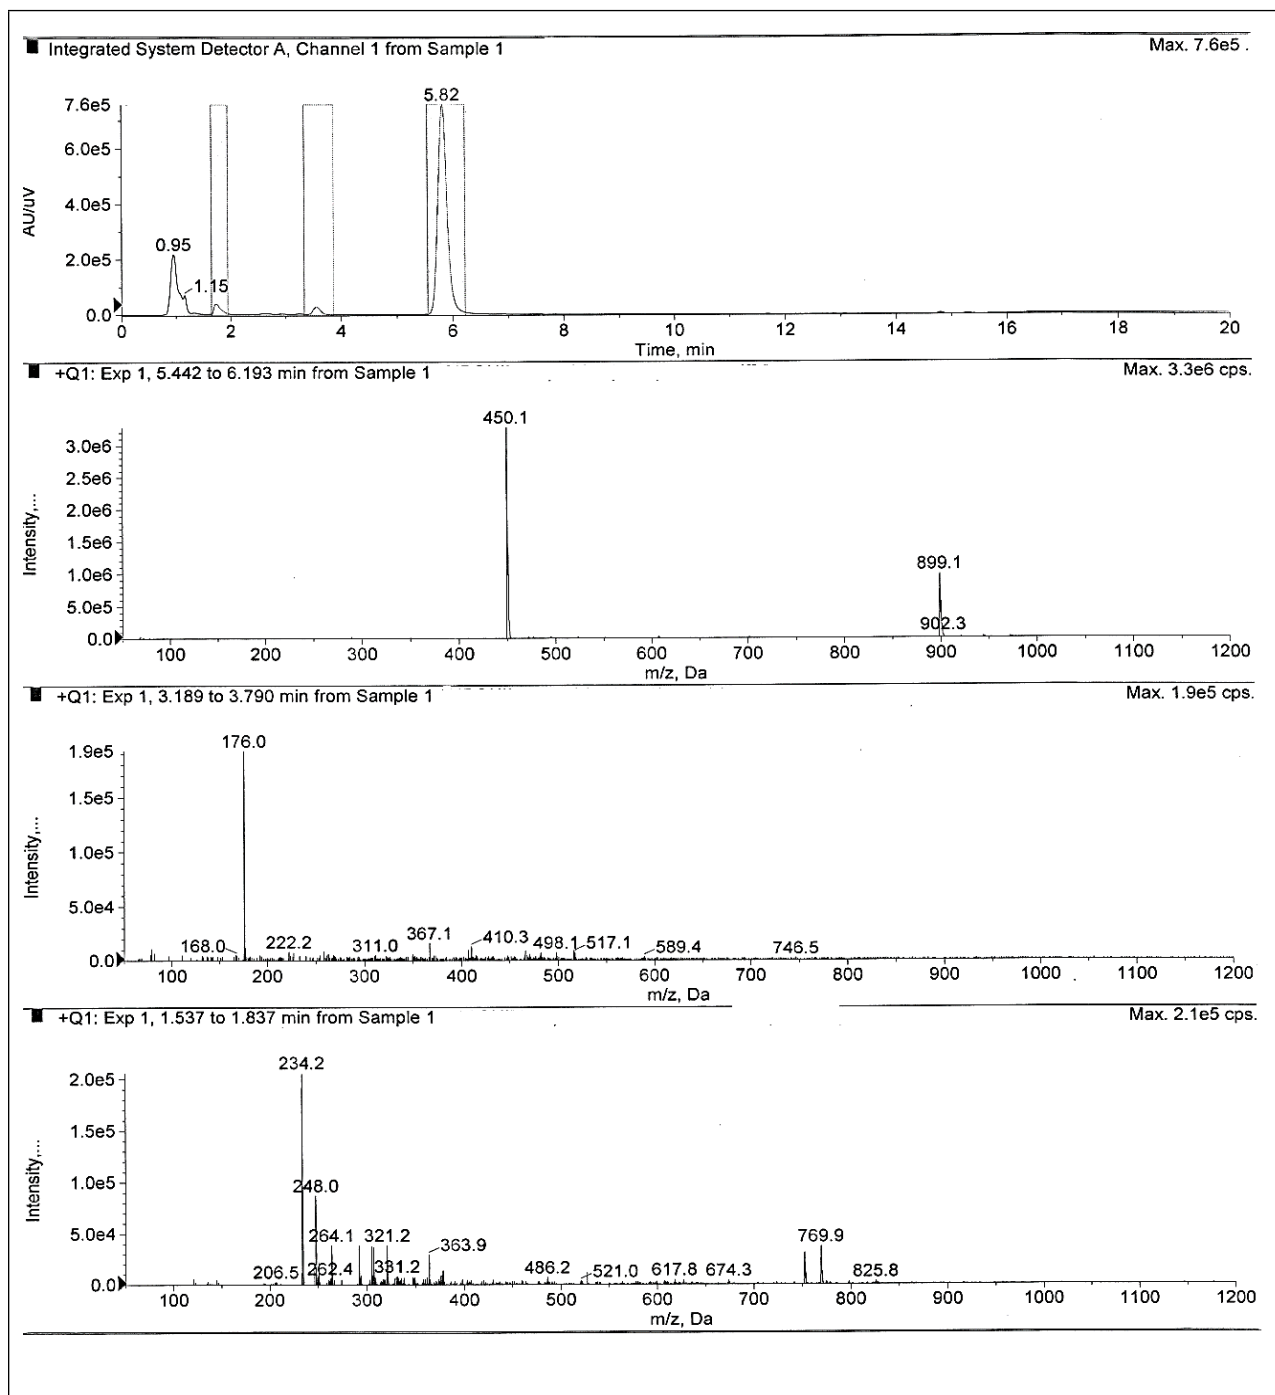

47  
48  
49  
50  
51

Fig. S5. LCMS Mass Spectra of degraded Bictegravir in peroxide

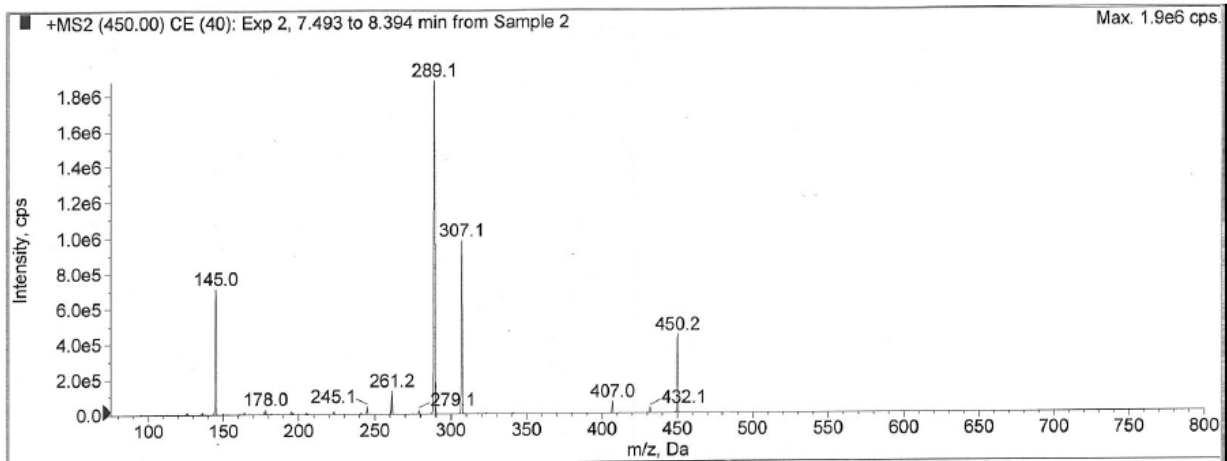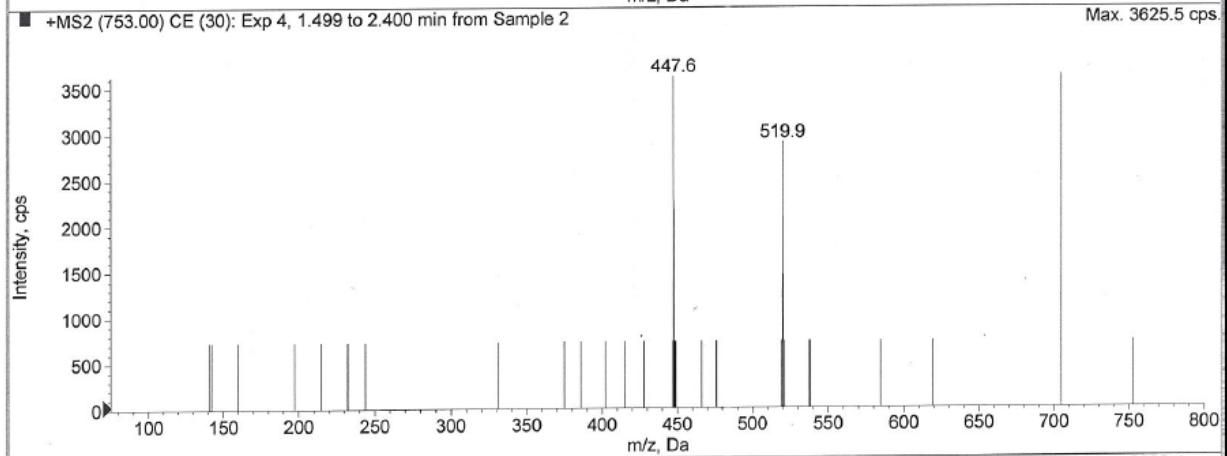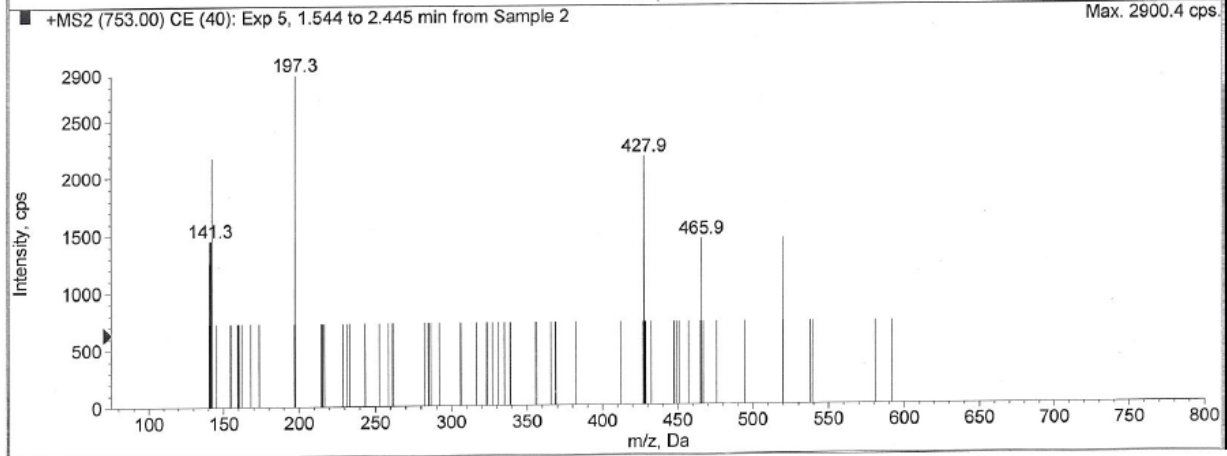

52

53

Fig. S6. LCMS/MS fragmentation pattern of degraded Bictegravir in peroxide

54

55

56

57  
 58  
 59  
 60  
 61  
 62  
 63  
 64  
 65  
 66  
 67  
 68  
 69  
 70  
 71  
 72  
 73  
 74  
 75  
 76  
 77  
 78  
 79  
 80  
 81  
 82  
 83  
 84  
 85  
 86  
 87  
 88  
 89  
 90

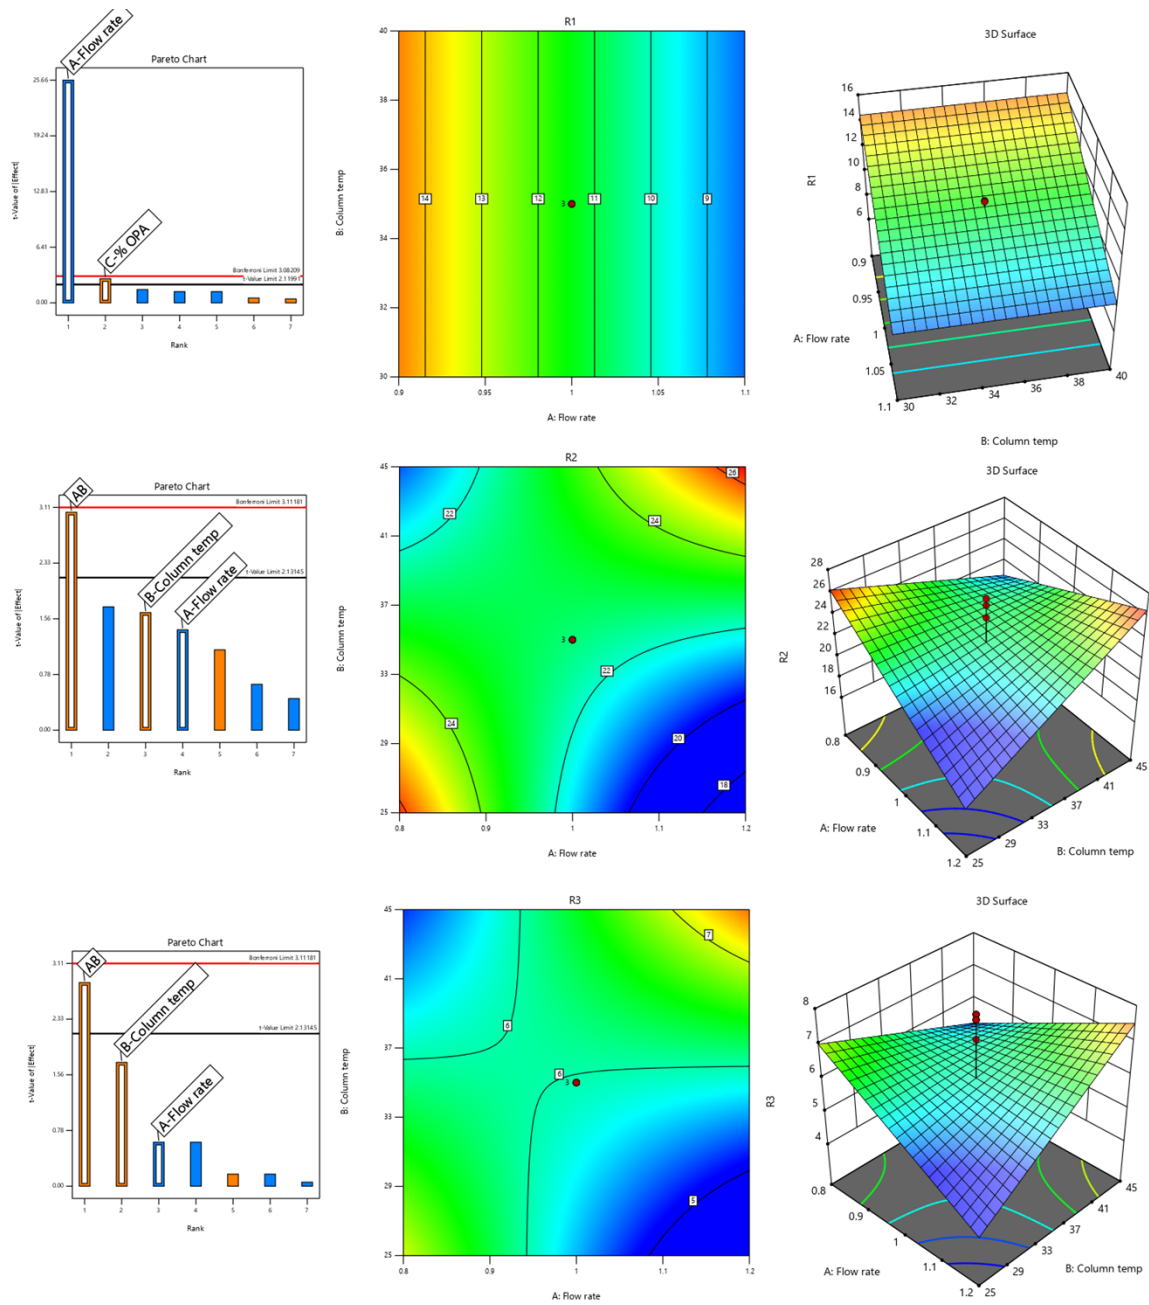

Fig. S7. Pareto charts, 2D half normal plots and 3D response surface plots



91  
92  
93  
94  
95  
96  
97  
98  
99  
100  
101  
102  
103  
104  
105  
106  
107  
108  
109  
110  
111  
112  
113  
114  
115  
116  
117  
118  
119  
120  
121  
122  
123  
124

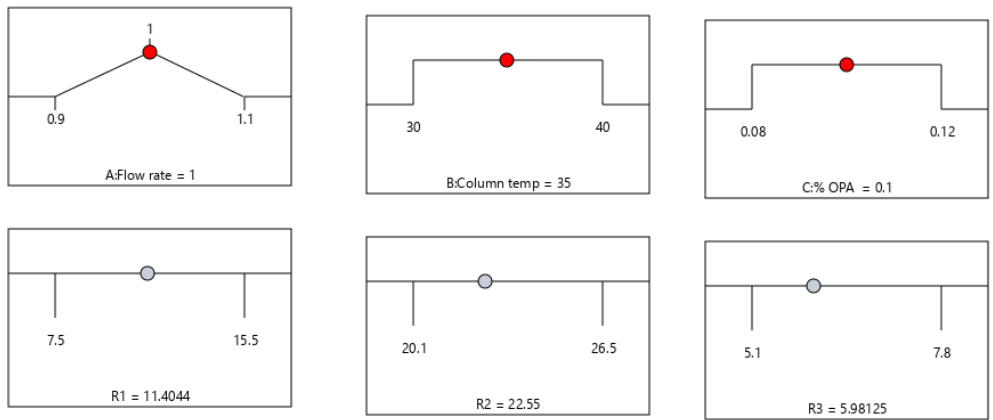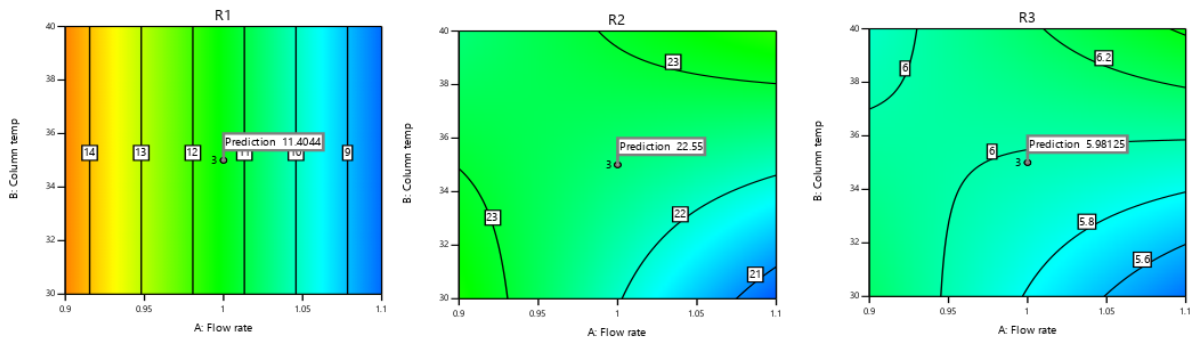

Fig. S8. The numerical solutions plots for all responses

125  
 126  
 127  
 128  
 129  
 130  
 131  
 132  
 133  
 134  
 135  
 136  
 137  
 138  
 139  
 140  
 141  
 142  
 143  
 144  
 14  
 147  
 148  
 149  
 150  
 151  
 152  
 153  
 154  
 155  
 156  
 157  
 158  
 159  
 160  
 161

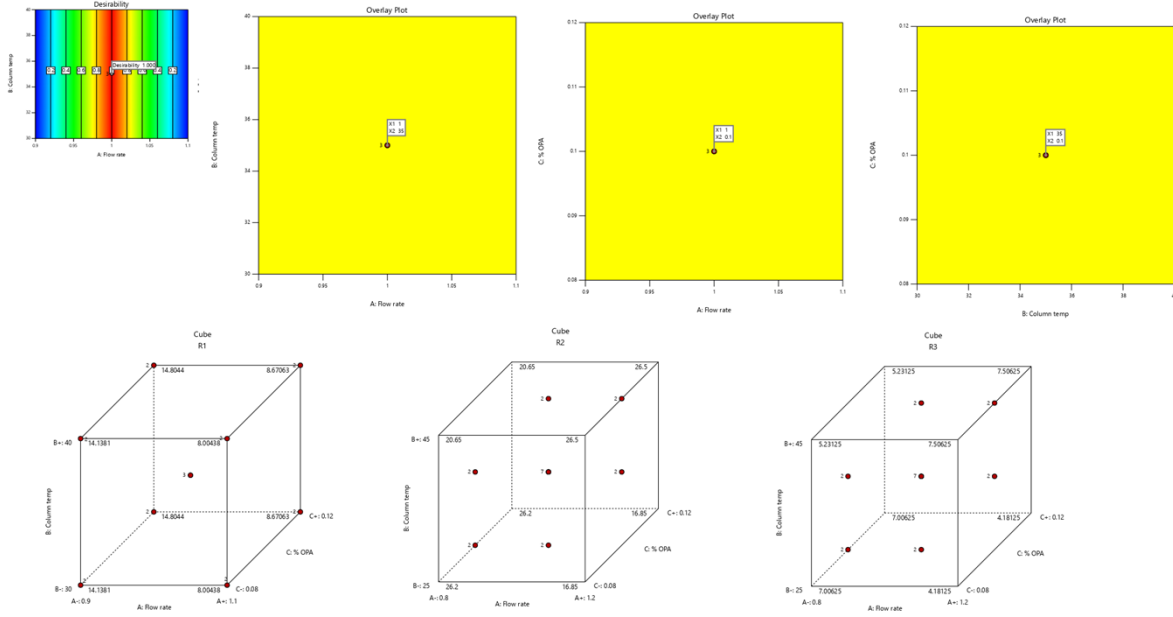

Fig. S9. 3D cube, overlay plots and desirability plots for the responses R1-R3

162

163 Table S1 Linearity plot of related novel Impurities in Bictegravir

164

| S.No.                      | Results          |                                       |                  |                                          |                  |                     |
|----------------------------|------------------|---------------------------------------|------------------|------------------------------------------|------------------|---------------------|
|                            | Conc.<br>(mg/ml) | Impurity-I Area<br>(Bictegravir acid) | Conc.<br>(mg/ml) | Impurity-II Area<br>(Methyl Bictegravir) | Conc.<br>(mg/ml) | Bictegravir<br>Area |
| 1                          | 0.00007          | 952                                   | 0.00007          | 1073                                     | 0.00007          | 2383                |
| 2                          | 0.00025          | 5573                                  | 0.00025          | 6597                                     | 0.00025          | 10205               |
| 3                          | 0.00037          | 7930                                  | 0.00037          | 9894                                     | 0.00037          | 14935               |
| 4                          | 0.00050          | 10229                                 | 0.00050          | 13507                                    | 0.00050          | 18776               |
| 5                          | 0.00062          | 12192                                 | 0.00062          | 16870                                    | 0.00062          | 23589               |
| 6                          | 0.00075          | 14638                                 | 0.00075          | 19836                                    | 0.00075          | 28277               |
| Correlation<br>coefficient | -                | 0.9991                                | -                | 0.9996                                   | -                | 0.9997              |

165

166

168 Table S2 Comparison of available literature methods with the currently developed method

| Name of the source                                                                                      | Mobile phase                                                                                                                         | Condition                                                                                           | Column                                               | Observation                                                                                                                                                                                                                                                                                                                                   |
|---------------------------------------------------------------------------------------------------------|--------------------------------------------------------------------------------------------------------------------------------------|-----------------------------------------------------------------------------------------------------|------------------------------------------------------|-----------------------------------------------------------------------------------------------------------------------------------------------------------------------------------------------------------------------------------------------------------------------------------------------------------------------------------------------|
| Prathipati, P. K., Mandal, S., & Destache, C. J. (2018). Biomedical Chromatography, e4379               | Mobile phase A consisted of 0.1% formic acid in water and Mobile phase B consisted of 0.1% formic acid in acetonitrile (80:20 % v/v) | Flow: 0.250 mL/min<br>Column temperature: 4°C - 30°C<br>Injection Volume: 2µl<br>Elution: Isocratic | Kinetex EVO C18 column, 50 × 3.0 mm, 5 µm            | 1. In this method LC-MS/MS is used to quantify the Bictegravir content along with other antiretroviral drug in Human plasma.<br>2. No related impurities of Bictegravir or other impurities were determined in this method.                                                                                                                   |
| Kokkiralala, T. K., & Suryakala, D. (2019). Journal of Taibah University for Science, 13(1), 1137–1146. | Mobile phase A consisted of 0.1% Orthophosphoric acid buffer and Mobile phase B consisted of Acetonitrile (50:50 % v/v)              | Flow: 1 mL/min<br>Column temperature: 30°C<br>Injection Volume: 10µl<br>Elution: Isocratic          | Denali C18 column (150 mm × 4.6 mm, 5 µm)            | 1. This is an assay method in which RP-HPLC is used to quantify the Bictegravir content in bulk and pharmaceutical dosage form. This is a cost reducing method but it cannot be used for the determination of related substances.<br>2. No related impurities of Bictegravir or other impurities determination were addressed in this method. |
| Gouget, H., Noé, G., Barrail-Tran, A., & Furlan, V. (2019). j.jpba.2019.113057                          | Mobile phase A consisted of 0.1% (v/v) formic acid in water and phase B consisted of acetonitrile                                    | Flow: 0.45 mL/min<br>Column temperature: 10°C -50°C<br>Injection Volume: 40µl<br>Elution: Gradient  | Acclaim TM RSLC 120 C18 column (2.1 × 100 mm, 2.2 m) | This UPLC-MS/MS method is used to quantify the Bictegravir content in Human plasma.<br>2. No related impurities of Bictegravir or other impurities were determined in this method.                                                                                                                                                            |

|                                                                                            |                                                                                                                                                         |                                                                                                             |                                                         |                                                                                                                                                                                                                                            |
|--------------------------------------------------------------------------------------------|---------------------------------------------------------------------------------------------------------------------------------------------------------|-------------------------------------------------------------------------------------------------------------|---------------------------------------------------------|--------------------------------------------------------------------------------------------------------------------------------------------------------------------------------------------------------------------------------------------|
| <p>Attaluri<br/>Tanuja*, Seru<br/>Ganapaty<br/>(2022).<br/>IndJPhaEdRes-<br/>56-4-1190</p> | <p>Mobile phase A<br/>consisted of<br/>Acetonitrile<br/>and Mobile<br/>phase B<br/>consisted of<br/>0.1% Formic<br/>acid in Water<br/>(70:30 % v/v)</p> | <p>Flow: 0.15 mL/min<br/>Column temperature:<br/>30°C<br/>Injection Volume: 10µl<br/>Elution: Isocratic</p> | <p>Zorbax XDB C18<br/>Column (2.1 X<br/>50 mm, 5µm)</p> | <p>1. In this Bio-analytical assay<br/>method UPLC-MS is used to<br/>quantify the Bictegravir<br/>content in Human plasma.<br/>2. No related impurities of<br/>Bictegravir or other impurities<br/>were determined in this<br/>method.</p> |
| <p>Current method</p>                                                                      | <p>Mobile phase<br/>A- 0.1%<br/>Orthophosphori<br/>c acid in water.<br/>Mobile phase<br/>B- Acetonitrile</p>                                            | <p>Flow: 1.0ml/min<br/>Column temperature:<br/>Ambient<br/>Injection Volume: 10µl<br/>Elution: Gradient</p> | <p>Xterra RP18<br/>150mm×4.6, 5µm</p>                   | <p>Determined the related<br/>impurities in Bictegravir drug<br/>substance in a simple and cost<br/>reducing RP-HPLC method<br/>and the method was evaluated<br/>by application of QbD(Design<br/>expert).</p>                             |

169

170

171

172

173 Table S3 Application of the developed method in real samples analysis

| Test by HPLC % area<br>Chromatographic purity | In-process batch sample | Holding time<br>Initial sample | Holding time<br>3 <sup>rd</sup> Month sample |
|-----------------------------------------------|-------------------------|--------------------------------|----------------------------------------------|
| Bictegravir                                   | 95.78                   | 99.81                          | 99.78                                        |
| Impurity-I<br>(Bictegravir acid)              | 2.06                    | ND                             | ND                                           |
| Impurity-II Area<br>(Methyl Bictegravir)      | 2.12                    | ND                             | Below LOQ<br>(LOQ = 0.07)                    |
| Unknown                                       | 0.08                    | 0.01                           | 0.03                                         |

174

175
